# Supplementary material for: The effectiveness of high dose zinc acetate lozenges on various common cold symptoms: a meta-analysis
Source: PubMed Central journal article supplement (PMC4359576; doi:10.1186/s12875-015-0237-6), 2015-02-25

## **Additional File 3 to:**

### **The effectiveness of high dose zinc acetate lozenges on various common cold symptoms: a meta-analysis**

**Harri Hemilä and Elizabeth Chalker**

Submitted to: BMC Family Practice

<http://www.biomedcentral.com/bmcfampract>

This file describes the intermediate calculations with RevMan to estimate the effect of high dose zinc acetate lozenges on the duration of various common cold symptoms.

#### **Harri Hemilä**

Department of Public Health

University of Helsinki

Helsinki, Finland

[harri.hemila@helsinki.fi](mailto:harri.hemila@helsinki.fi)

<http://www.mv.helsinki.fi/home/hemila/>

#### **Contents**

Page

- 2 A version of Fig. 2 to show the raw data and estimates of effect on respiratory symptoms in the included studies. The figure was generated using RevMan.
- 3 A version of Fig. 3 to show the raw data and estimates of effect on systemic symptoms in the included studies. The figure was generated using RevMan.
- 4 RevMan Figure showing the pooled effects of zinc acetate lozenges on respiratory and systemic symptom durations. This figure was redrawn with Gnuplot for the report as Fig. 4.

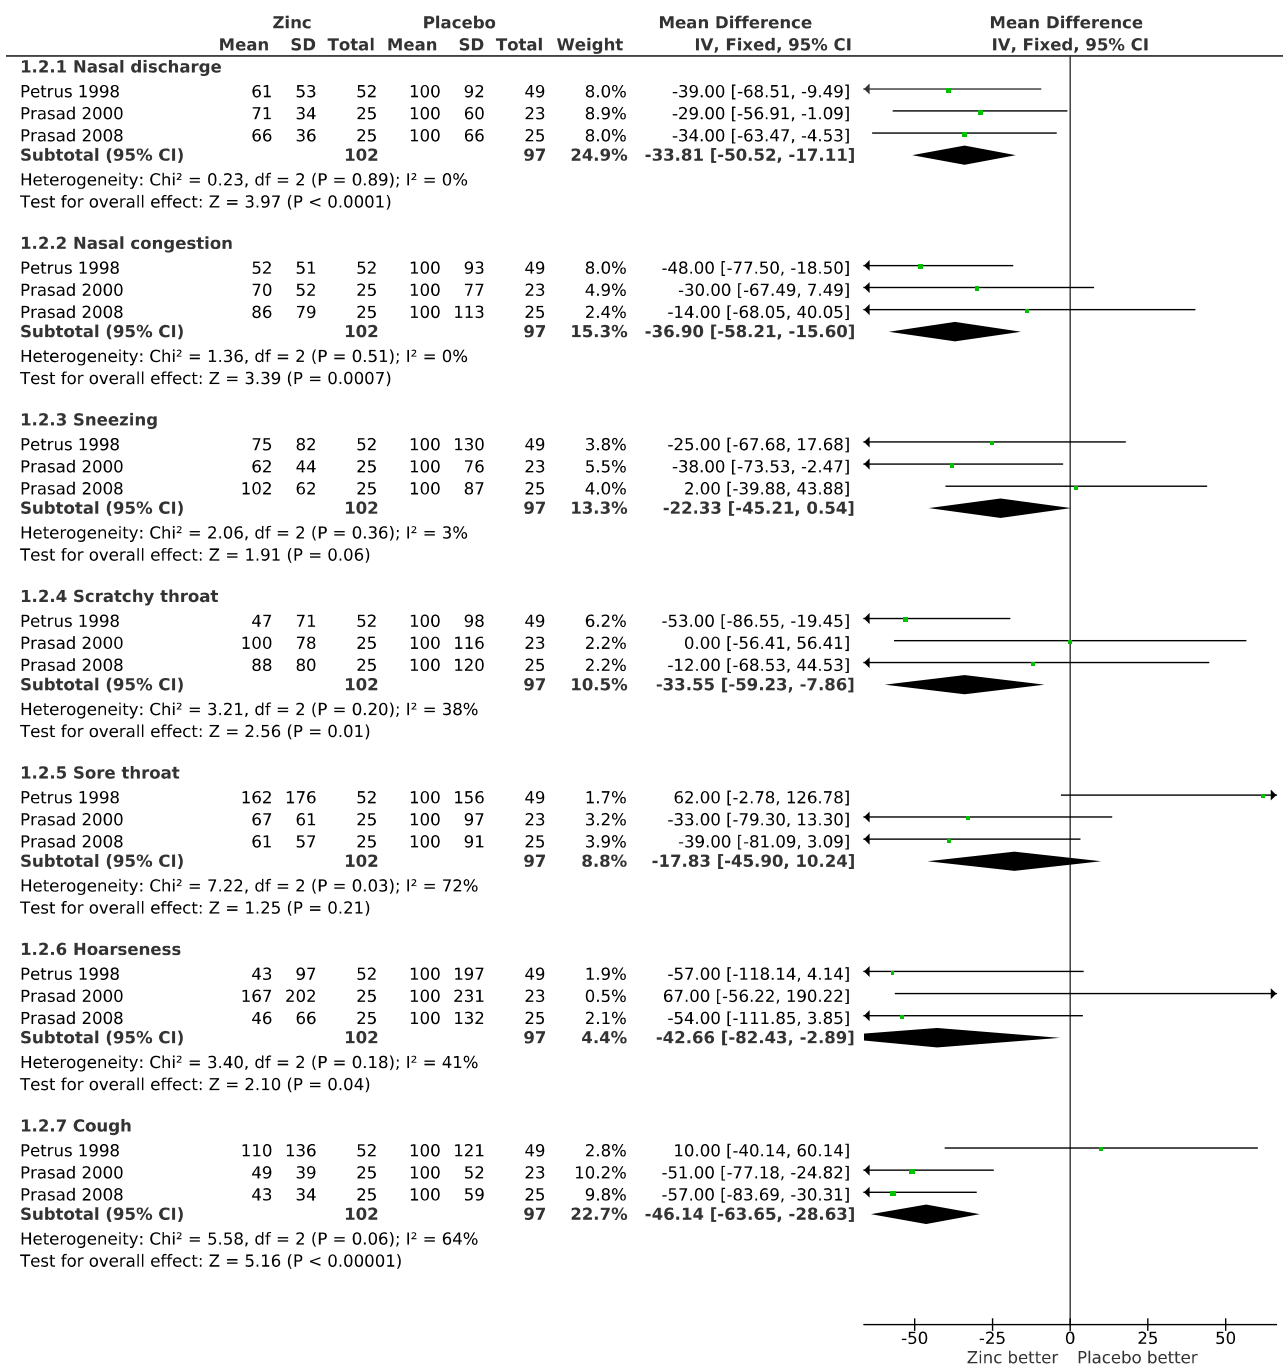

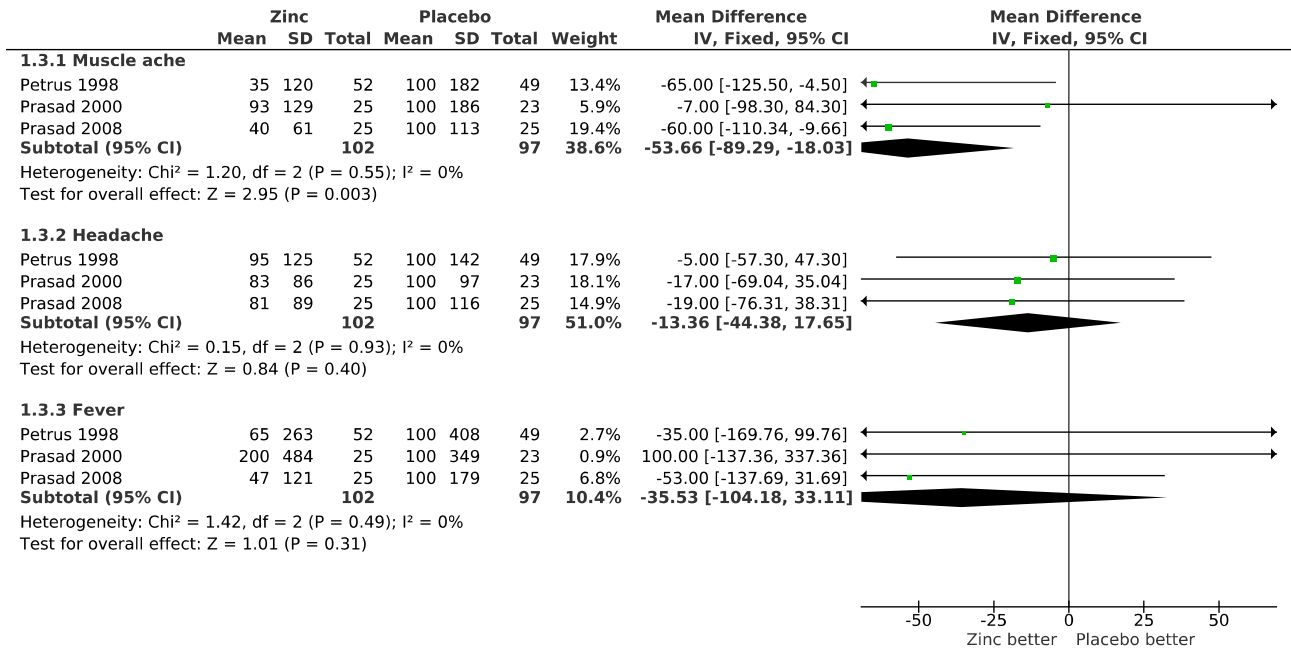

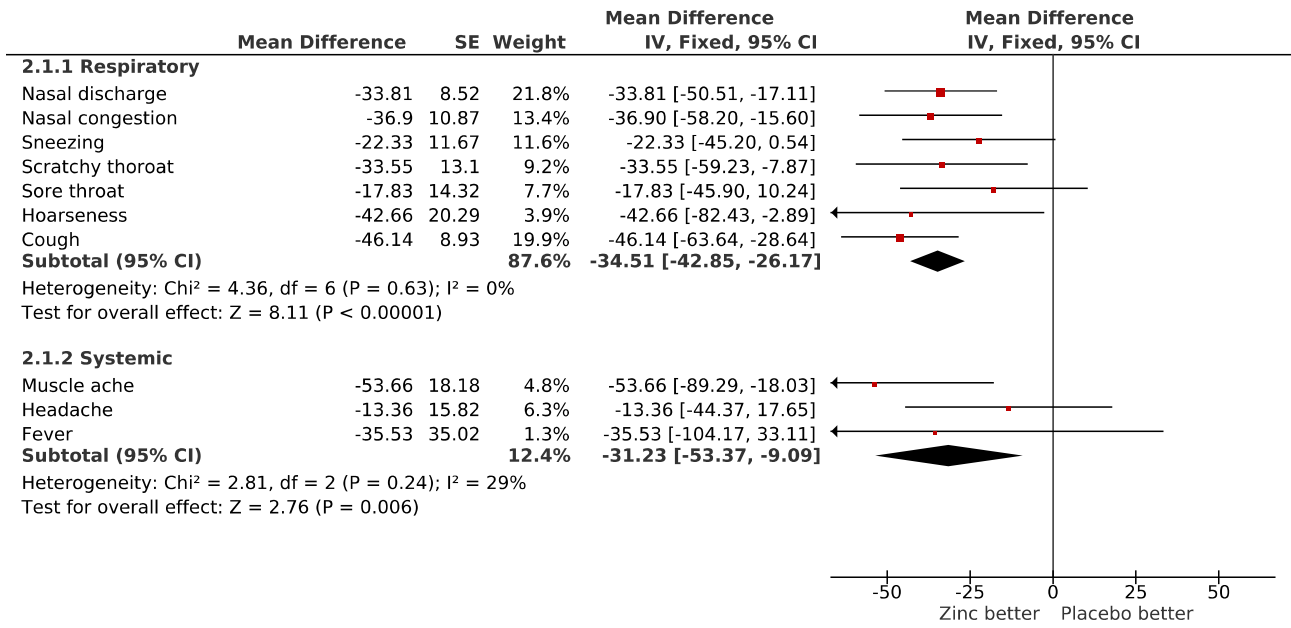

Supplement: 12875_2015_237_MOESM3_ESM.pdf [file 12875_2015_237_MOESM3_ESM.pdf]
